# Supplementary figures and images for: Managing Female Athlete Health: Auditing the Representation of Female versus Male Participants among Research in Supplements to Manage Diagnosed Micronutrient Issues
Source: MDPI journal article supplement (doi:10.3390/nu14163372), 2022-08-17

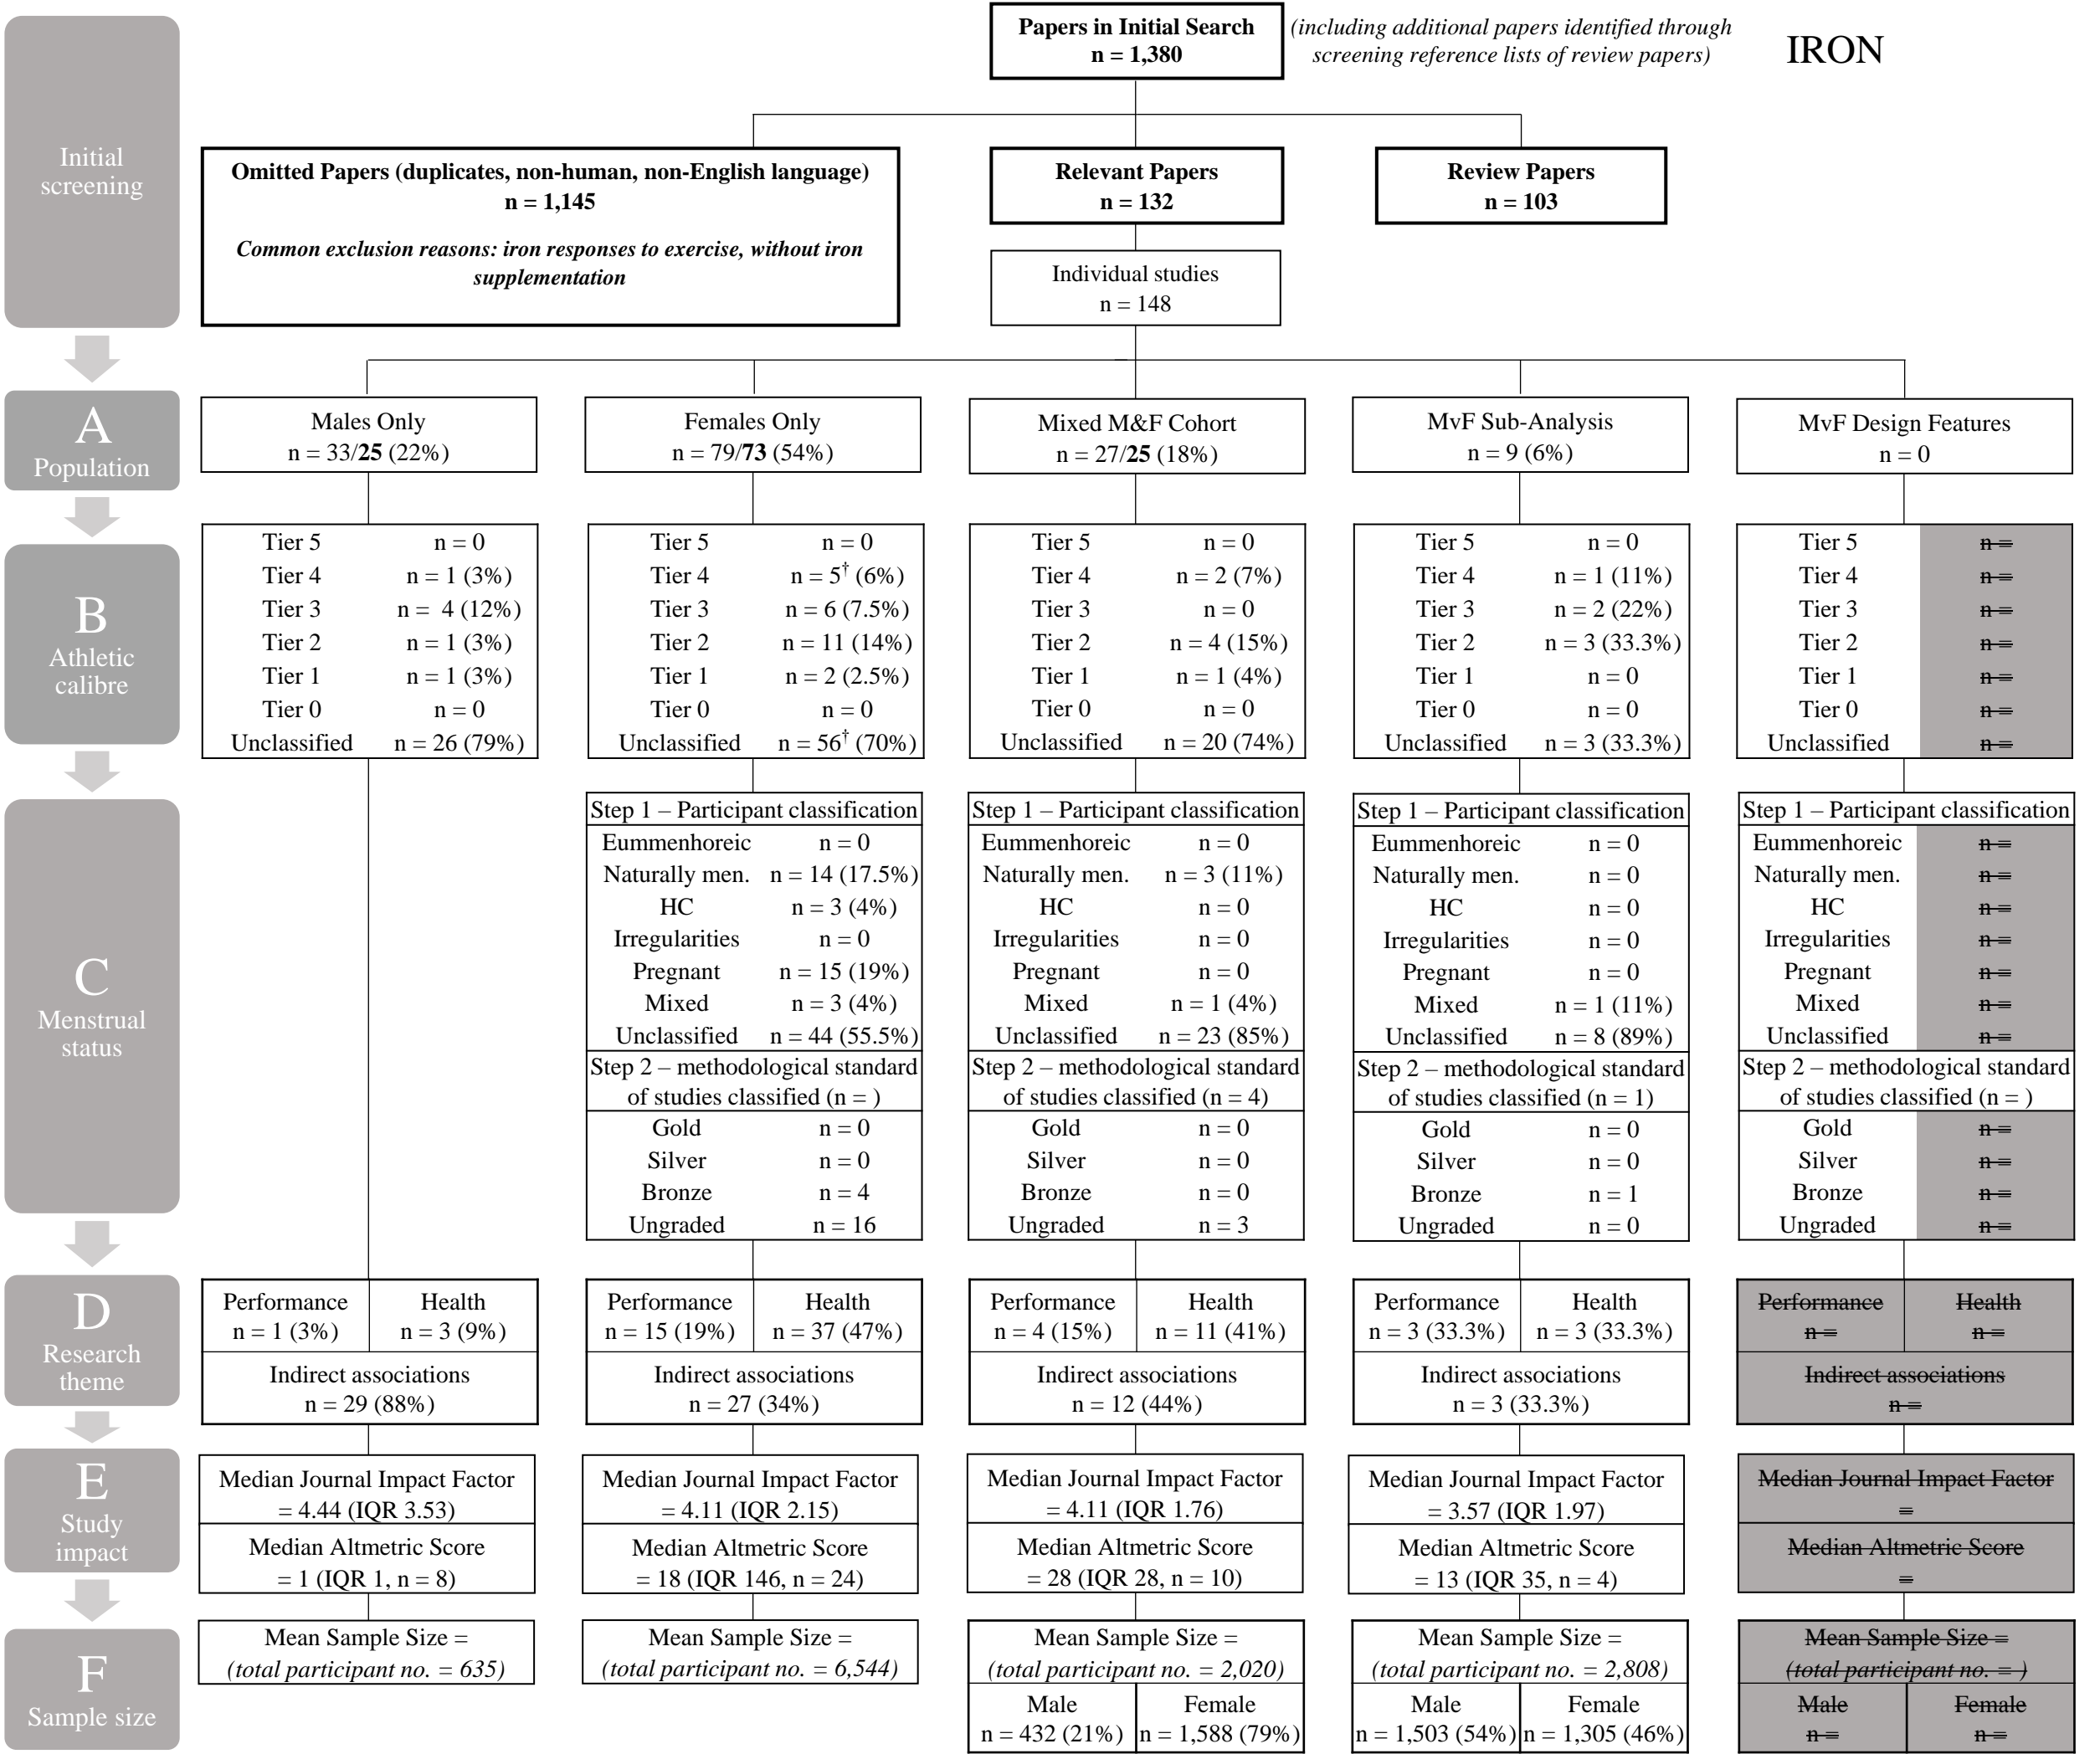

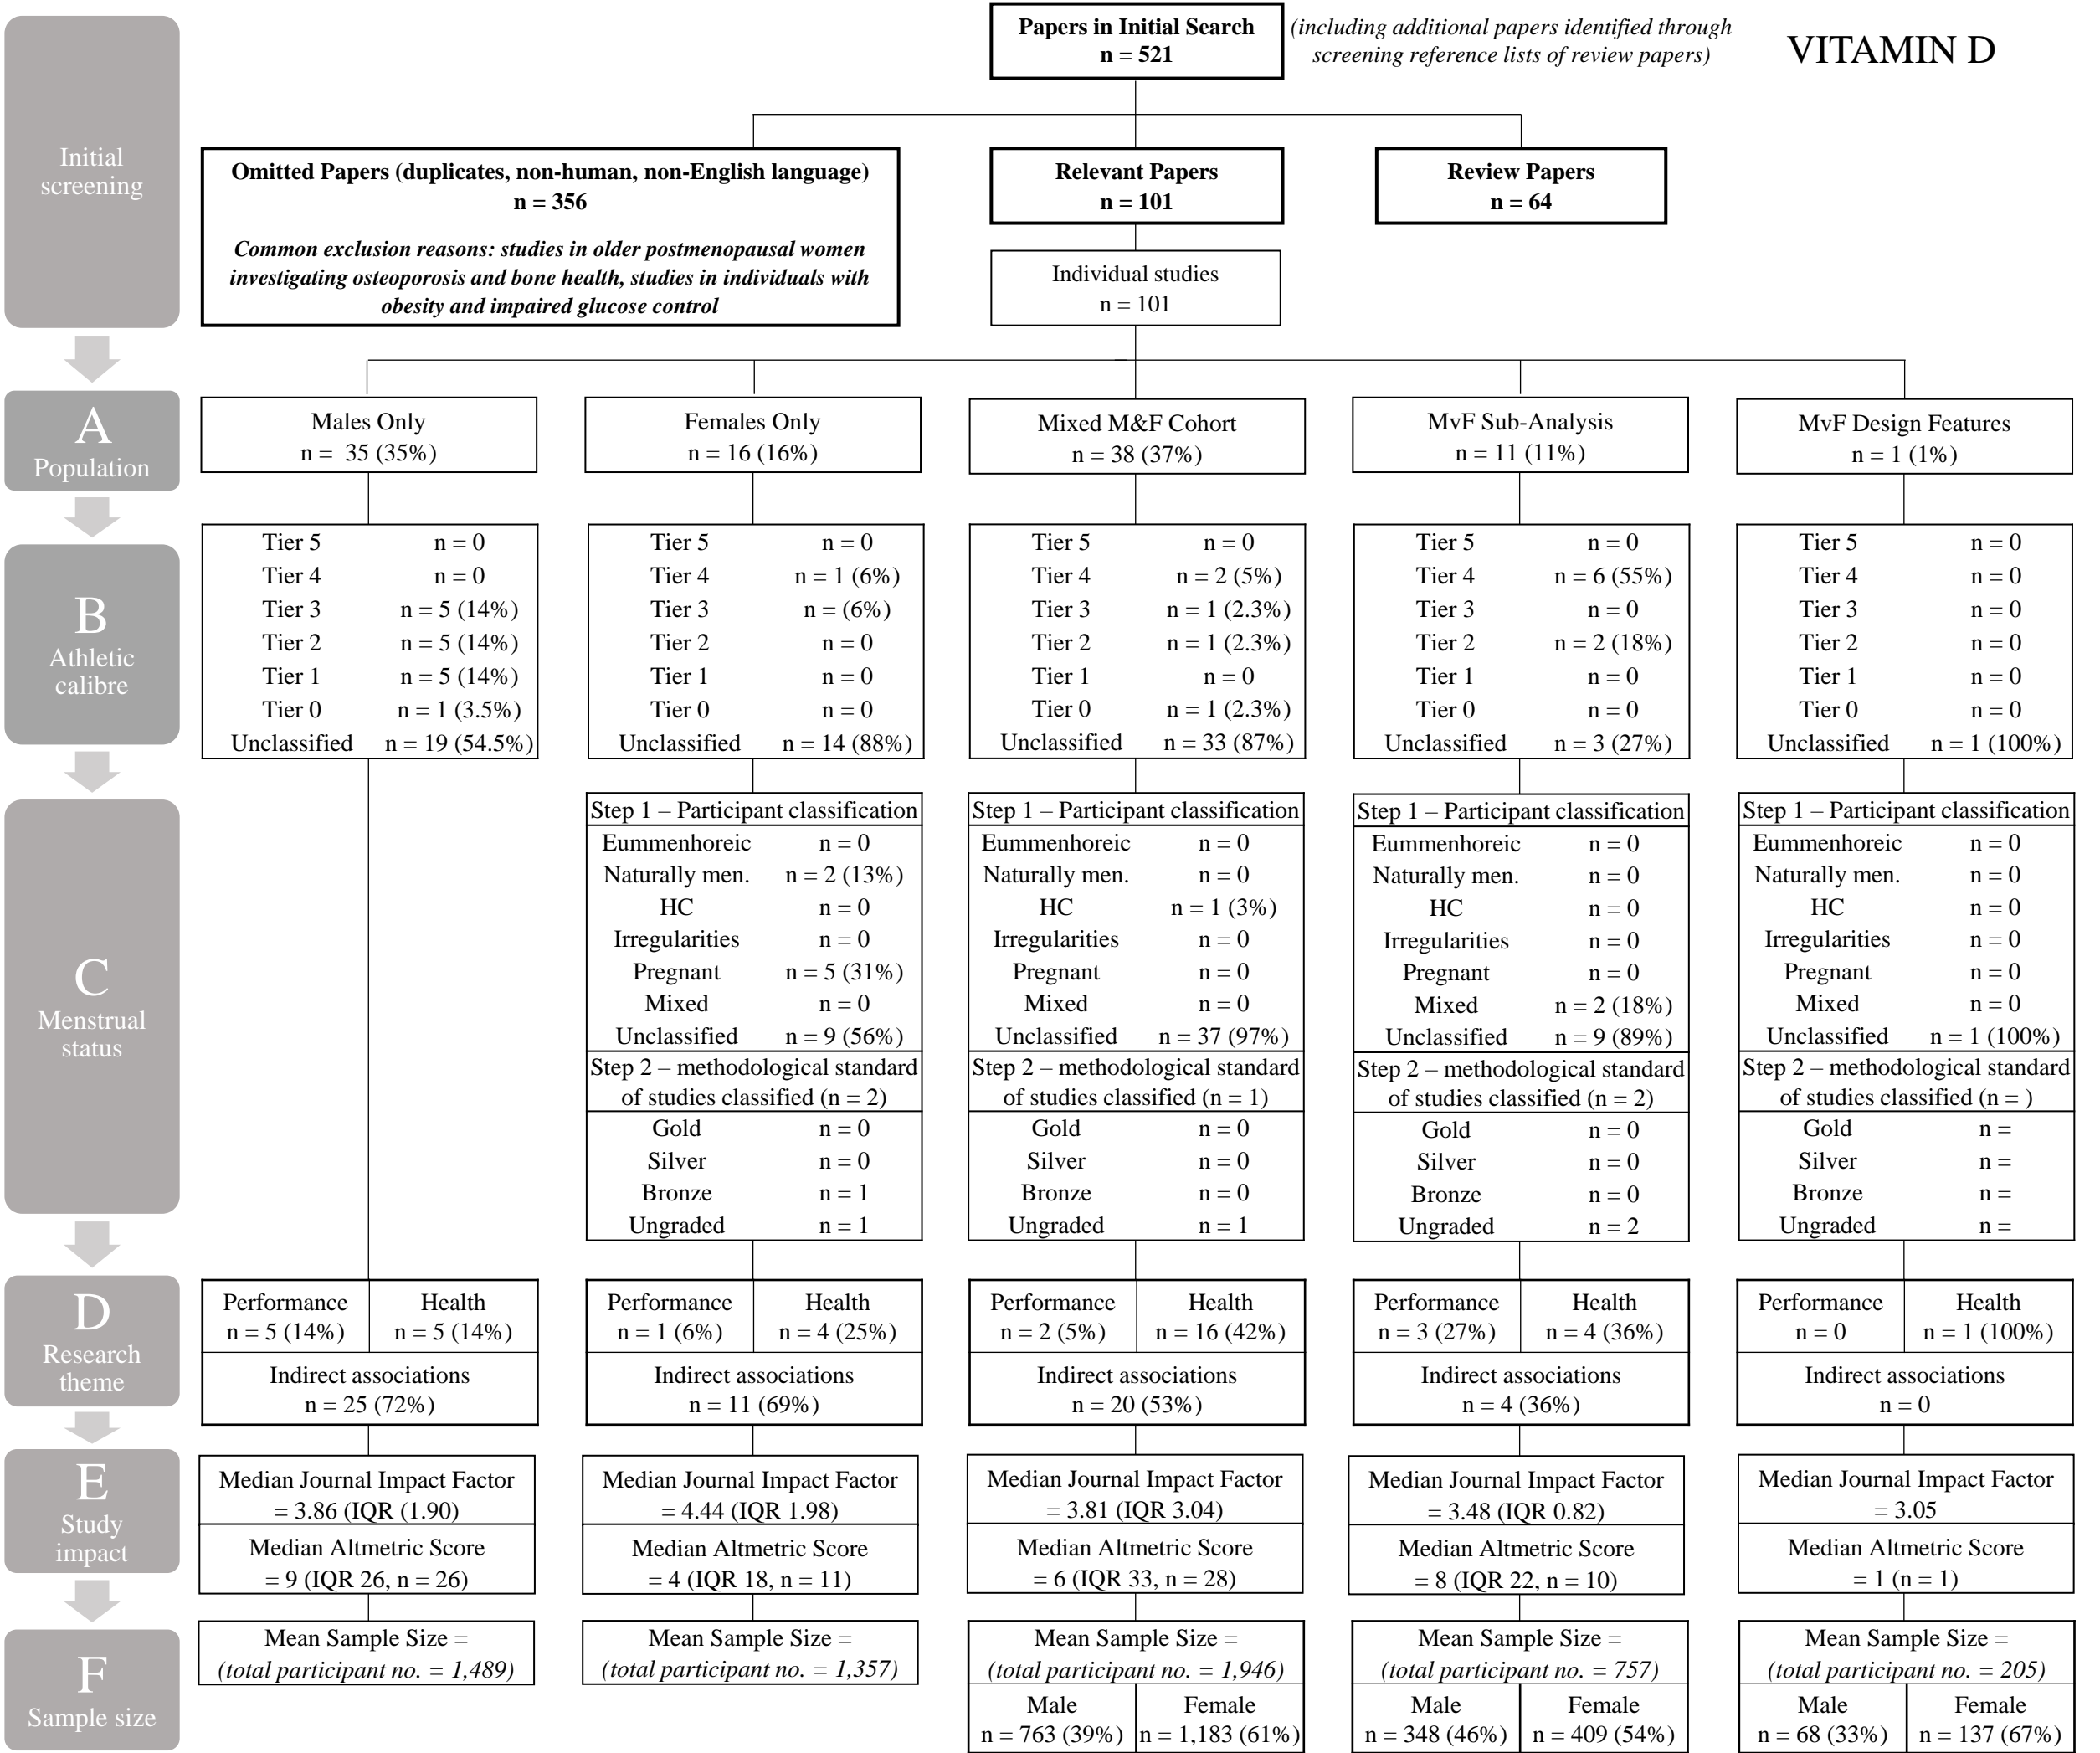

Supplement: s1 [file s1]
